# Supplementary material for: Genomic signatures of recombination in a natural population of the bdelloid rotifer Adineta vaga
Source: PubMed Central journal article supplement (PMC7749112; doi:10.1038/s41467-020-19614-y), 2020-12-18
Supplement: 41467_2020_19614_MOESM3_ESM.pdf [file 41467_2020_19614_MOESM3_ESM.pdf]

## Reporting Summary

Nature Research wishes to improve the reproducibility of the work that we publish. This form provides structure for consistency and transparency in reporting. For further information on Nature Research policies, see [Authors & Referees](#) and the [Editorial Policy Checklist](#).

### Statistics

For all statistical analyses, confirm that the following items are present in the figure legend, table legend, main text, or Methods section.

n/a Confirmed

- The exact sample size ( $n$ ) for each experimental group/condition, given as a discrete number and unit of measurement
- A statement on whether measurements were taken from distinct samples or whether the same sample was measured repeatedly
- The statistical test(s) used AND whether they are one- or two-sided  
*Only common tests should be described solely by name; describe more complex techniques in the Methods section.*
- A description of all covariates tested
- A description of any assumptions or corrections, such as tests of normality and adjustment for multiple comparisons
- A full description of the statistical parameters including central tendency (e.g. means) or other basic estimates (e.g. regression coefficient) AND variation (e.g. standard deviation) or associated estimates of uncertainty (e.g. confidence intervals)
- For null hypothesis testing, the test statistic (e.g.  $F$ ,  $t$ ,  $r$ ) with confidence intervals, effect sizes, degrees of freedom and  $P$  value noted  
*Give  $P$  values as exact values whenever suitable.*
- For Bayesian analysis, information on the choice of priors and Markov chain Monte Carlo settings
- For hierarchical and complex designs, identification of the appropriate level for tests and full reporting of outcomes
- Estimates of effect sizes (e.g. Cohen's  $d$ , Pearson's  $r$ ), indicating how they were calculated

*Our web collection on [statistics for biologists](#) contains articles on many of the points above.*

### Software and code

Policy information about [availability of computer code](#)

Data collection

Trimmomatic (V0.33), FastQC (v0.11.3), SPAdes (version 3.6.0), QUAST (v5.0.0), SMRT Analysis Portal (v2.3.0), scripts from the Blobology pipeline (revision bc2300c, <https://github.com/blaxterlab/blobology>), BLAST+ (version 2.2.31), all\_bz (v.15), AUGUSTUS (v.2.7), GeneMark.ES Suite (version 4.32), Bowtie 2 (v.2.3.2), SAMtools (v.1.4.1), STAR aligner (v. 2.4.2a), minimap2 (version 2.16-r922), BCFtools (v.1.4.1), GATK (version 4.1.2.0), bedtools (v2.26.0), SnpSift (v.4.3s), RepeatMasker (version open-4.0.7), MUSCLE (version 3.8.31), HapCutToVcf utility from fgbio (version 0.2.0-SNAPSHOT).

Data analysis

BLAST+ (version 2.2.31), BUSCO (v. 3.1.0), VEP (version 96.3), MScanX (available at <http://chibba.pgml.uga.edu/mcscan2/MCScanX.zip>; accessed August 28, 2017), PLINK (v1.90b5.4), VCFtools (v. 0.1.15), populations program from the Stacks pipeline (version 2.4), HapCUT2 (revision bd1a739, <https://github.com/vibansal/HapCUT2>), WhatsHap (version 0.14.1), PhiPack (available at <http://www.maths.otago.ac.nz/~dbryant/software/PhiPack.tar.gz>; accessed July 1, 2018), LDhat (version 2.2), SplitsTree (version 4.14.6), RDP4 (v.4.97), mlRho (version 2.9), PhyML (version 3.1), MEGA7 (version 7.0.26), RAxML (version 8.2.12), Dendroscope (version 3.5.10), SOWHAT (revision 907c289, <https://github.com/josephryan/sowhat>), SLiM (version 3.2), awk (version 3.1.7), R (versions 3.3.2 and 3.6.3), ggplot2 R package (version 3.2.1), fANCOVA R package (version 0.5-1), poppr R package (v2.8.6), stats R package (version 3.6.3), boot R package (version 1.3.24). Custom scripts available at [https://github.com/vakh57/bdelloid\\_scripts](https://github.com/vakh57/bdelloid_scripts).

For manuscripts utilizing custom algorithms or software that are central to the research but not yet described in published literature, software must be made available to editors/reviewers. We strongly encourage code deposition in a community repository (e.g. GitHub). See the Nature Research [guidelines for submitting code & software](#) for further information.

Policy information about [availability of data](#)

All manuscripts must include a [data availability statement](#). This statement should provide the following information, where applicable:

- Accession codes, unique identifiers, or web links for publicly available datasets
- A list of figures that have associated raw data
- A description of any restrictions on data availability

The Illumina sequencing data have been deposited at NCBI under BioProject ID PRJNA498886. Individual SRA accession numbers for deposited HiSeq reads are provided in Supplementary Table 22. MiSeq reads included in the obtained assembly of the *A. vaga* genome (L1) have been deposited with SRA accession numbers SRR8133179, SRR8133180, and SRR8133181. PacBio reads used to assess accuracy of phasing for L1 have been deposited at NCBI under BioProject ID PRJNA558051.

The assembled (diploid) contigs for *A. vaga* (L1) are available at NCBI: the Whole Genome Shotgun project has been deposited at DDBJ/ENA/GenBank under the accession WJQV00000000. The version described in this paper is version WJQV01000000.

The L1 diploid contigs are also available at <https://doi.org/10.6084/m9.figshare.11620518.v2>. The dataset accessible through this link also includes files containing haploid sub-assembly of the L1 genome, annotation of protein-coding genes in the GTF format produced for the L1 diploid contigs, and coordinates of gene models transferred to the haploid sub-assembly. Raw and filtered SNPs identified in L1-L11 (SNP dataset I) are available at <https://doi.org/10.6084/m9.figshare.11625780.v2>.

The data used in the analysis of mitochondrial variation are available at <https://doi.org/10.6084/m9.figshare.12008790.v2> and <http://doi.org/10.6084/m9.figshare.11396955.v2>. This analysis also involved publicly available sequences of *Philodina citrina* and *Rotaria rotatoria* mitochondrial genomes (the respective GenBank accession numbers: FR856884.1 and GQ304898.1). For annotation, we used a publicly available RNA-seq dataset (generated for the *A. vaga* genome published in 2013) which can be downloaded at [http://www.genoscope.cns.fr/adineta/data/Avaga\\_rnaseq\\_sort.bam](http://www.genoscope.cns.fr/adineta/data/Avaga_rnaseq_sort.bam). BUSCO analysis involved publicly available assemblies of *A. vaga* genome downloaded from [http://www.genoscope.cns.fr/adineta/data/Adineta\\_vaga\\_v2.0.scaffolds.fa.gz](http://www.genoscope.cns.fr/adineta/data/Adineta_vaga_v2.0.scaffolds.fa.gz) and of *A. ricciae* genome available at GenBank under the accession GCA\_900240375.1. GenBank accession numbers for reference COX1 sequences used in Supplementary Figs. 1-3 are given in Supplementary Data 9.

The source data underlying Fig. 2c, 3c-d, 4a-b, 5, 7, Supplementary Figs. 1-3, 8, 19d, and 27-28 are provided as a Source Data file. Haplotype sequences reconstructed for L6-L9 in the three segments used to produce Fig. 6 are provided as Supplementary Data 7. All other data supporting the findings of this study are available from the corresponding author upon request.

## Field-specific reporting

Please select the one below that is the best fit for your research. If you are not sure, read the appropriate sections before making your selection.

- Life sciences       Behavioural & social sciences       Ecological, evolutionary & environmental sciences

For a reference copy of the document with all sections, see [nature.com/documents/nr-reporting-summary-flat.pdf](https://nature.com/documents/nr-reporting-summary-flat.pdf)

## Ecological, evolutionary & environmental sciences study design

All studies must disclose on these points even when the disclosure is negative.

|                          |                                                                                                                                                                                                                                                                                                                                                                                                                                                                                                                                                                                                                                                                                                                                                                                                                                                                 |
|--------------------------|-----------------------------------------------------------------------------------------------------------------------------------------------------------------------------------------------------------------------------------------------------------------------------------------------------------------------------------------------------------------------------------------------------------------------------------------------------------------------------------------------------------------------------------------------------------------------------------------------------------------------------------------------------------------------------------------------------------------------------------------------------------------------------------------------------------------------------------------------------------------|
| Study description        | To address the question of whether bdelloid rotifers engage in genetic exchanges, we obtained whole-genome variation data in a bdelloid rotifer <i>Adineta vaga</i> . For this, we established 11 clonal cultures, L1-L11, each started from a single wild-caught rotifer matching the morphological criteria of <i>A. vaga</i> . The genomic DNA of 11 <i>A. vaga</i> cultures was sequenced to the coverage of ~40-100X with Illumina paired-end libraries on the Illumina HiSeq platform. Additionally, we sequenced one of the lineages, L1, on the MiSeq platform to produce a de novo genome assembly which was used as a reference genome in the subsequent analyses. The obtained sequencing data were used to search for signatures of recombination and genetic exchange among <i>A. vaga</i> individuals.                                            |
| Research sample          | A group of 11 <i>A. vaga</i> individuals including 9 individuals sampled from the Moscow region of Russia and 2 individuals sampled from the Kostroma region of Russia, 550 km to the NE. We chose to perform population genetic analyses in <i>A. vaga</i> as it was the first bdelloid species for which a complete genome was sequenced.                                                                                                                                                                                                                                                                                                                                                                                                                                                                                                                     |
| Sampling strategy        | We sequenced all <i>A. vaga</i> cultures that we were able to establish in the laboratory over the course of ~2.5 years.                                                                                                                                                                                                                                                                                                                                                                                                                                                                                                                                                                                                                                                                                                                                        |
| Data collection          | We extracted individual rotifers from clumps of moss which grew on trunks of aspen <i>Populus tremula</i> at height 120-170 cm. Moss was collected and the corresponding sampling locations were recorded by Yan R. Galimov, Elena A. Mnatsakanova, and Alexey S. Kondrashov.                                                                                                                                                                                                                                                                                                                                                                                                                                                                                                                                                                                   |
| Timing and spatial scale | Out of the 11 <i>A. vaga</i> individuals used in the study, nine (L1-L4 and L6-L10) were sampled from the Moscow region and two, L5 and L11, sampled from the Kostroma region, 550 km to the NE. Individuals L1, L2, and L4 were extracted from clumps of moss collected in October 2011. Individual L3 was extracted from a clump of moss collected in October 2012. The rest of individuals were extracted from moss samples collected in 2013.<br>We did not predetermine collection periods. Genome sequencing technology used in the current study requires a considerable amount of DNA (~100 ng) which could only be obtained from an <i>A. vaga</i> clonal culture. We were able to establish only 3 clonal cultures from rotifers collected in 2011. A necessity to increase the sample size motivated sample collection carried out in 2012 and 2013. |
| Data exclusions          | Analysis of SNPs revealed that three of the sequenced individuals (L1-L3) form a separate group (Fig. 1c and Supplementary Fig. 8). To reduce the potential effect of population structure, we mainly focused the subsequent analyses on individuals L4-L11 excluding                                                                                                                                                                                                                                                                                                                                                                                                                                                                                                                                                                                           |

individuals L1-L3 from consideration. If not indicated otherwise, the reported results are based on the analysis of individuals L4-L11.

Reproducibility

Randomization

Blinding

Did the study involve field work?  Yes  No

## Field work, collection and transport

Field conditions

Location

Access and import/export

Disturbance

## Reporting for specific materials, systems and methods

We require information from authors about some types of materials, experimental systems and methods used in many studies. Here, indicate whether each material, system or method listed is relevant to your study. If you are not sure if a list item applies to your research, read the appropriate section before selecting a response.

### Materials & experimental systems

| n/a                                 | Involved in the study                                           |
|-------------------------------------|-----------------------------------------------------------------|
| <input checked="" type="checkbox"/> | <input type="checkbox"/> Antibodies                             |
| <input checked="" type="checkbox"/> | <input type="checkbox"/> Eukaryotic cell lines                  |
| <input checked="" type="checkbox"/> | <input type="checkbox"/> Palaeontology                          |
| <input type="checkbox"/>            | <input checked="" type="checkbox"/> Animals and other organisms |
| <input checked="" type="checkbox"/> | <input type="checkbox"/> Human research participants            |
| <input checked="" type="checkbox"/> | <input type="checkbox"/> Clinical data                          |

### Methods

| n/a                                 | Involved in the study                           |
|-------------------------------------|-------------------------------------------------|
| <input checked="" type="checkbox"/> | <input type="checkbox"/> ChIP-seq               |
| <input checked="" type="checkbox"/> | <input type="checkbox"/> Flow cytometry         |
| <input checked="" type="checkbox"/> | <input type="checkbox"/> MRI-based neuroimaging |

## Animals and other organisms

Policy information about [studies involving animals: ARRIVE guidelines](#) recommended for reporting animal research

Laboratory animals

Wild animals

Field-collected samples

Ethics oversight

Note that full information on the approval of the study protocol must also be provided in the manuscript.
